# Supplementary material
Source: Springer Nature journal article supplement (https://www.springermedizin.de/resource/supplementary/12935_2011_308_MOESM7_ESM.pdf/9540282)

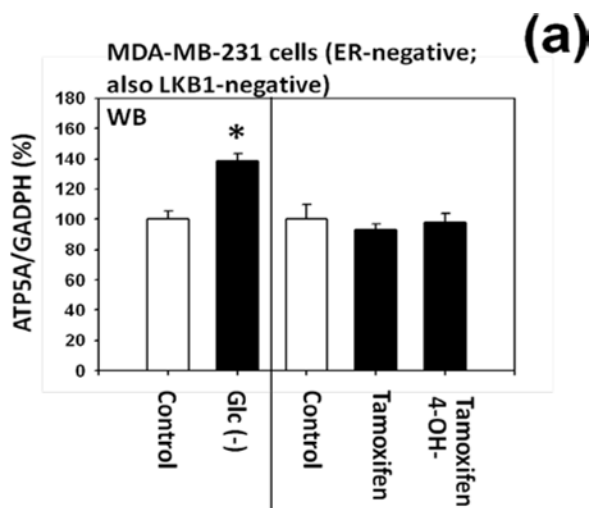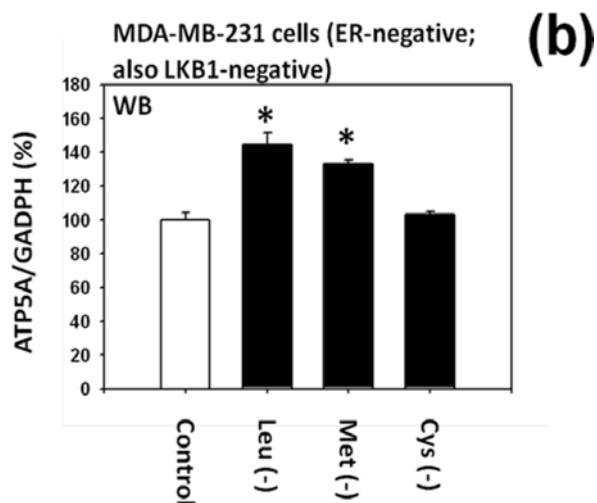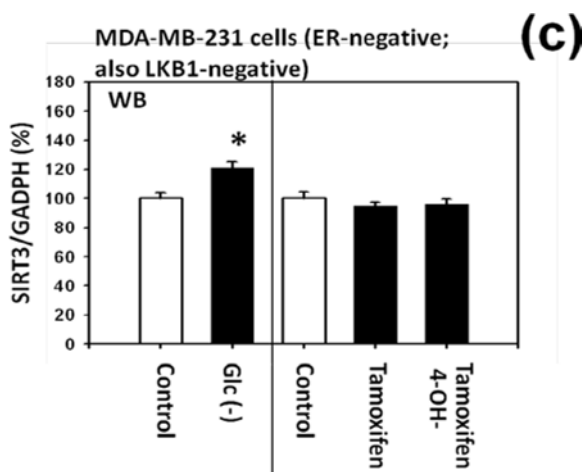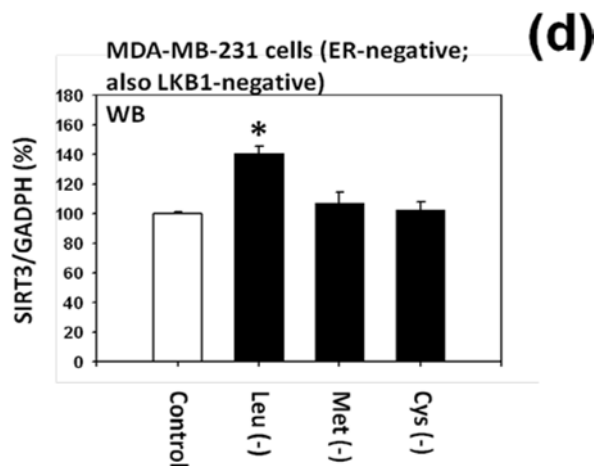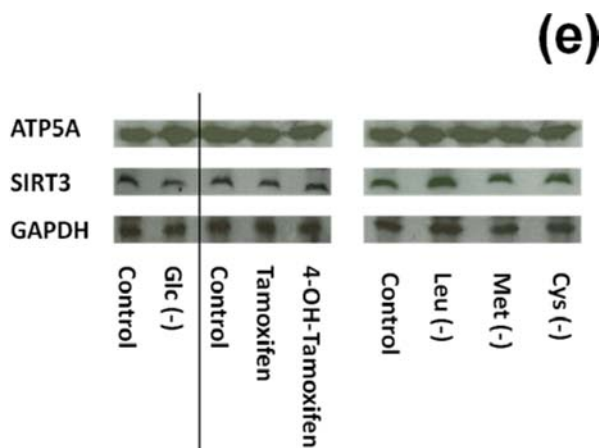

Supplement: MOESM7 [file 9540282]
